# Supplementary material
Source: PubMed Central journal article supplement (PMC7891866)

## SUPPLEMENTARY MATERIALS

### **New Appendix #1:** Brief description of the Joslin Kidney Study

The Joslin Kidney Study (JKS) is a longitudinal observation that aims to investigate the determinants and to describe the natural history of PRD in T1D. Results from this study and protocols used were previously published (8, 29-31). Participants were recruited from among 3,500 adults with T1D, 95% Caucasian, who attended the Joslin clinic between 1991 and 2009. According to the median values of ACR from 2 or more consecutive urine samples obtained during the 2-year period preceding enrollment (baseline), 3 study groups were assembled: Macro-Albuminuria (ACR  $\geq$ 300 mg/g) ( $n= 526$ ), Micro-Albuminuria ( $30 \leq$  ACR  $<$ 300 mg/g) ( $n= 563$ ), and Normo-Albuminuria (ACR  $<$ 30 mg/g) ( $n= 795$ ). All participants were followed for 7-15 years. They had biannual examinations either during routine clinic visits or were invited for a special visit or were examined at their homes. Biospecimens obtained at examinations were stored in  $-85^{\circ}\text{C}$ . Serum creatinine was used to determine renal function at baseline and its changes during follow-up visits. Protocols to calibrate serum creatinine measurements over time were described previously (31). Estimates of GFR were obtained using the Chronic Kidney Disease Epidemiology Collaboration formula (33). To estimate the slope of eGFR decline, we extracted the linear component of every subject's trajectory with more than 5 measurements of eGFR. All JKS subjects were queried every 2 years against rosters of the United States Renal Data System to ascertain patients who developed ESKD. The last inquiry was conducted in 2015. In the present study PRD (primary outcome) was recognized if individuals' long term eGFR loss greater than or equal to  $3 \text{ ml/min/1.73m}^2/\text{year}$  or they developed ESKD within 7-15 years of follow-up (29-31, 34).

**Supplementary Table S1:** Effect estimates of tumor necrosis factor (TNF) receptors on risk of PRD in Micro-Albuminuria Study according to two definitions of decliners (eGFR loss  $\geq 3$  ml/min/1.73m<sup>2</sup>/year and eGFR loss  $\geq 5$  ml/min/1.73m<sup>2</sup>/year).

| Gene Name                                                    | Protein name | Micro-Albuminuria Study<br>eGFR loss $\geq 3$ ml/min/year<br>n= 148 |         | Micro-Albuminuria Study<br>eGFR loss $\geq 5$ ml/min/year<br>n= 148 |         |
|--------------------------------------------------------------|--------------|---------------------------------------------------------------------|---------|---------------------------------------------------------------------|---------|
|                                                              |              | OR                                                                  | P value | OR                                                                  | P value |
| <b><i>TNF receptors associated with the both outcome</i></b> |              |                                                                     |         |                                                                     |         |
| TNF-R1A                                                      | TNF-R1       | 1.64                                                                | 0.0015  | 1.59                                                                | 0.0038  |
| TNF-R1B                                                      | TNF-R2       | 1.86                                                                | 0.0001  | 1.72                                                                | 0.0009  |
| TNF-R3                                                       | LTBR         | 1.46                                                                | 0.0140  | 1.44                                                                | 0.0210  |
| TNF-R4                                                       | OX40         | 1.64                                                                | 0.0017  | 1.52                                                                | 0.0085  |
| TNF-R6                                                       | FAS          | 1.49                                                                | 0.0090  | 1.44                                                                | 0.0210  |
| TNF-R6B                                                      | DcR3         | 1.56                                                                | 0.0043  | 1.52                                                                | 0.0085  |
| TNF-R7                                                       | CD27         | 1.73                                                                | 0.0006  | 1.69                                                                | 0.0014  |
| TNF-R10A                                                     | TRAIL-R1     | 1.61                                                                | 0.0024  | 1.58                                                                | 0.0047  |
| TNF-R10B                                                     | TRAIL-R2     | 1.40                                                                | 0.0290  | 1.46                                                                | 0.0170  |
| TNF-R11A                                                     | RANK         | 1.43                                                                | 0.0200  | 1.43                                                                | 0.0250  |
| TNF-R14                                                      | HVEM         | 1.60                                                                | 0.0024  | 1.63                                                                | 0.0024  |
| TNF-R21                                                      | DR6          | 1.49                                                                | 0.0100  | 1.52                                                                | 0.0085  |
| TNF-R27                                                      | EDA2R        | 1.45                                                                | 0.0150  | 1.38                                                                | 0.0410  |
| <b><i>TNF Receptors inconsistent associations</i></b>        |              |                                                                     |         |                                                                     |         |
| TNF-R10C                                                     | TRAIL-R3     | 1.22                                                                | 0.1900  | 1.22                                                                | 0.2000  |
| TNF-R11B                                                     | OPG          | 1.36                                                                | 0.0410  | 1.24                                                                | 0.1500  |
| TNF-R12A                                                     | TWEAKR       | 1.24                                                                | 0.1600  | 1.31                                                                | 0.0810  |
| TNF-R13B                                                     | TACI         | 1.30                                                                | 0.0820  | 1.36                                                                | 0.0520  |
| TNF-R19                                                      | TROY         | 1.29                                                                | 0.0890  | 1.25                                                                | 0.1500  |
| TNF-R19L                                                     | RELT         | 1.24                                                                | 0.1400  | 1.40                                                                | 0.0300  |
| <b><i>Findings for TNF ligands</i></b>                       |              |                                                                     |         |                                                                     |         |
| TNF-L5                                                       | CD40-L       | 0.93                                                                | 0.6300  | 0.89                                                                | 0.4300  |
| TNF-L6                                                       | FASLG        | 1.13                                                                | 0.4100  | 0.94                                                                | 0.7000  |
| TNF-L7                                                       | CD70         | 1.39                                                                | 0.0320  | 1.25                                                                | 0.1500  |
| TNF-L10                                                      | TRAIL        | 1.36                                                                | 0.0460  | 1.16                                                                | 0.3200  |
| TNF-L13                                                      | APRIL        | 1.18                                                                | 0.2700  | 1.14                                                                | 0.4000  |
| TNF-L13B                                                     | BAFF         | 1.33                                                                | 0.0580  | 1.30                                                                | 0.0840  |

**Revised Supplementary Table S2.** Comparison of effect estimates for risk of ESKD according to baseline plasma concentration of TNF receptors measured by SOMAScan, OLINK, and ELISA in 130 individuals with Macro-Albuminuria.

|          |            | Tumor necrosis factor (TNF) Receptor Measured: |               |          |               |          |               |
|----------|------------|------------------------------------------------|---------------|----------|---------------|----------|---------------|
|          |            | By SOMAScan                                    |               | By OLINK |               | By ELISA |               |
|          |            | HR                                             | $-\log_{10}P$ | HR       | $-\log_{10}P$ | HR       | $-\log_{10}P$ |
| TNF-R1A  | (TNFR1)    | 1.49                                           | 2.80          | 1.64     | 3.72          | 1.40     | 2.19          |
| TNF-R1B  | (TNFR2)    | 1.82                                           | 5.07          | 1.62     | 3.85          | -        | -             |
| TNF-R4   | (OX40)     | 1.36                                           | 1.94          | 1.49     | 2.82          | -        | -             |
| TNF-R8   | (CD30)     | 1.15                                           | 0.57          | -        | -             | -        | -             |
| TNF-R9   | (4-1BB)    | 1.26                                           | 1.28          | -        | -             | -        | -             |
| TNF-R14  | (HVEM)     | 1.15                                           | 0.62          | 1.73     | 4.54          | -        | -             |
| TNF-R19  | (TROY)     | 1.50                                           | 2.80          | 2.15     | 6.33          | -        | -             |
| TNF-R19L | (RELT)     | 1.46                                           | 2.51          | 1.63     | 4.00          | -        | -             |
| TNF-R21  | (DR6)      | 1.25                                           | 1.10          | 1.32     | 1.49          | -        | -             |
| TNF-R27  | (XEDAR)    | 1.36                                           | 1.87          | 1.63     | 4.01          | -        | -             |
| TNF-R3   | (LTBR)     | 1.01                                           | 0.03          | 1.96     | 5.26          | -        | -             |
| TNF-R6   | (Fas)      | -                                              | -             | 1.32     | 1.70          | -        | -             |
| TNF-R6B  | (DcR3)     | 1.27                                           | 1.36          | 1.83     | 5.40          | 1.56     | 2.55          |
| TNF-R7   | (CD27)     | 0.75                                           | 1.62          | 1.60     | 3.51          | 1.63     | 4.09          |
| TNF-R10A | (TRAIL R1) | 0.61                                           | 4.00          | 1.56     | 3.32          | -        | -             |
| TNF-R10B | (TRAIL R2) | -                                              | -             | 2.00     | 6.47          | -        | -             |
| TNF-R11A | (RANK)     | 0.90                                           | 0.41          | 1.68     | 3.96          | -        | -             |
| TNF-R12A | (Fn14)     | 1.21                                           | 0.90          | 1.74     | 3.85          | -        | -             |
| TNF-R10C | (DcR1)     | -                                              | -             | 1.03     | 0.10          | -        | -             |
| TNF-R11B | (OPG)      | 0.95                                           | 0.15          | 1.00     | 0.01          | -        | -             |
| TNF-R13B | (TACI)     | 1.04                                           | 0.12          | 1.21     | 0.92          | -        | -             |
| TNF-R13C | (BAFFR)    | 0.91                                           | 0.34          | -        | -             | -        | -             |
| TNF-R17  | (BCMA)     | 0.76                                           | 1.59          | -        | -             | -        | -             |
| TNF-R18  | (GITR)     | 1.18                                           | 0.74          | -        | -             | -        | -             |
| TNF-R25  | (DR3)      | 0.87                                           | 0.62          | -        | -             | -        | -             |
| EDAR     | (EDAR)     | 1.16                                           | 0.64          | -        | -             | -        | -             |
| TNF-R5   | (CD40)     | -                                              | -             | -        | -             | -        | -             |
| TNF-R10D | (DcR2)     | -                                              | -             | -        | -             | -        | -             |
| TNF-R13A | (BCMA)     | -                                              | -             | -        | -             | -        | -             |
| TNF-R16  | (NGFR)     | -                                              | -             | -        | -             | -        | -             |

Statistical significance is considered if  $-\log_{10}$  P-value  $\geq 1.30$ , or  $p \leq 0.05$ . Please notice that HRs were higher almost for all TNF receptors measured by OLINK platform. Out of 16 TNF receptors measured by both platforms, 9 showed similar results (7 positive and 2 negative), and 7 showed discrepant results (positive on OLINK and negative on SOMAscan). HR, hazard ratio; ESKD, end stage kidney disease; TNF, tumor necrosis factor.

**Supplementary Table S3.** Tumor necrosis factor (TNF) receptors and ligands included in OLINK 11 panels. (A) Name of OLINK 11 panels and tumor necrosis factor (TNF) receptors and ligands included in each panel. (B) Spearman correlations coefficients ( $r_s$ ) between eGFR slope and 6 TNF proteins present on INFLAMMATION Panel. Measurements were done in 38 subjects.

A.

| Name of OLINK 11 Panel     | Name of TNF Receptors and/or Ligands included in each OLINK Panel                                                                                                      |
|----------------------------|------------------------------------------------------------------------------------------------------------------------------------------------------------------------|
| CARDIOVASCULAR II(v.5002)  | <b>TNF-R10A (TNFRSF10A)*</b> , TNF-R10B (TRAIL-R2), TNF-R11A (TNFRSF11A), TNF-R13B (TNFRSF13B), TNF-L5 (CD40-L)                                                        |
| CARDIOVASCULAR III(v.6002) | TNF-R1A (TNF-R1), TNF-R1B (TNF-R2), TNF-R3 (LTBR), TNF-R6 (FAS), TNF-R10C (TNFRSF10C), <b>TNF-R11B (OPG)*</b> , TNF-R14 (TNFRSF14), TNF-L13B (TNFSF13B)                |
| DEVELOPMENT(v.3501)        | TNF-R19L (RELT)                                                                                                                                                        |
| NEUROLOGY(v.8001)          | TNF-R12A (TNFRSF12A), TNF-R21 (TNFRSF21), TNF-R27 (EDA2R)                                                                                                              |
| ONCOLOGY II(v.7001)        | TNF-R6B (TNFRSF6B), TNF-R7 (CD27), TNF-R19 (TNFRSF19), TNF-L6 (FASLG), TNF-L7 (CD70), <b>TNF-L10 (TRAIL)*</b> , TNF-L13 (TNFSF13)                                      |
| CARDIOMETABOLIC(v.3601)    | -                                                                                                                                                                      |
| IMMUNE RESPONSE(v.3201)    | EDAR                                                                                                                                                                   |
| CELL REGULATION(v.3701)    | <b>TNF-R10A (TNFRSF10A)*</b>                                                                                                                                           |
| INFLAMMATION(v.3004)       | TNF-R5 (CD40), TNF-R9 (TNFRSF9), <b>TNF-R11B (OPG)*</b> , <b>TNF-L10 (TRAIL)*</b> , TNF-L1A (TNF), TNF-L1B (LTA), TNF-L11 (TRANCE), TNF-L12 (TWEAK), TNF-L14 (TNFSF14) |
| METABOLISM(v.3401)         | -                                                                                                                                                                      |
| ORGAN DAMAGE(v.3301)       | -                                                                                                                                                                      |

\*The 5 panels enclosed with box were used in our study. The TNF receptors or ligands in bold letters with asterisks are duplicated on 2 panels.

B.

|         | $r_s$ | P value | <i>n</i> |
|---------|-------|---------|----------|
| TNF-R5  | -0.25 | 0.1325  | 38       |
| TNF-R9  | -0.12 | 0.4552  | 38       |
| TNF-L1B | 0.04  | 0.827   | 38       |
| TNF-L11 | -0.08 | 0.6275  | 38       |
| TNF-L12 | 0.03  | 0.8383  | 38       |
| TNF-L14 | -0.08 | 0.6238  | 38       |

**New Supplementary Table S4:** Spearman rank correlation coefficients plasma concentration of 13 tumor necrosis factor (TNF) receptors and duration of plasma storage in individuals in Macro-Albuminuria ( $n= 24$ ).

|          | Baseline |         | 1st follow-up |         | 2nd follow-up |         |
|----------|----------|---------|---------------|---------|---------------|---------|
|          | $r_s$    | P Value | $r_s$         | P Value | $r_s$         | P Value |
| TNF-R1A  | 0.18     | 0.4057  | 0.10          | 0.6360  | 0.09          | 0.6875  |
| TNF-R1B  | 0.03     | 0.8925  | 0.04          | 0.8416  | 0.04          | 0.8432  |
| TNF-R14  | 0.11     | 0.6188  | 0.00          | 0.9903  | 0.03          | 0.8861  |
| TNF-R3   | 0.27     | 0.2034  | 0.13          | 0.5420  | 0.21          | 0.3172  |
| TNF-R7   | -0.06    | 0.7744  | -0.07         | 0.7435  | 0.14          | 0.5244  |
| TNF-R27  | -0.25    | 0.2472  | 0.00          | 0.9936  | 0.11          | 0.6158  |
| TNF-R4   | 0.28     | 0.1822  | 0.00          | 0.9952  | 0.06          | 0.7758  |
| TNF-R21  | 0.29     | 0.1698  | 0.11          | 0.5945  | 0.31          | 0.1344  |
| TNF-R6   | 0.32     | 0.1214  | 0.30          | 0.1523  | 0.46          | 0.0223  |
| TNF-R6B  | -0.15    | 0.4944  | 0.13          | 0.5474  | 0.02          | 0.9132  |
| TNF-R10A | -0.15    | 0.4944  | 0.10          | 0.6360  | -0.01         | 0.9678  |
| TNF-R10B | -0.09    | 0.6728  | 0.00          | 0.9839  | 0.10          | 0.6535  |
| TNF-R11A | -0.08    | 0.7238  | 0.03          | 0.9068  | -0.08         | 0.7236  |

\*Median duration of storage at baseline, 1st and 2nd follow-ups were 21 years (interquartile range, 17-23), 17 years (15-18), and 13 years (10-17), respectively.

**Supplementary Figure S1.** Matrix of Spearman correlation coefficients among baseline plasma concentrations for 13 tumor necrosis factor (TNF) receptors in the combined studies ( $n= 343$ ).

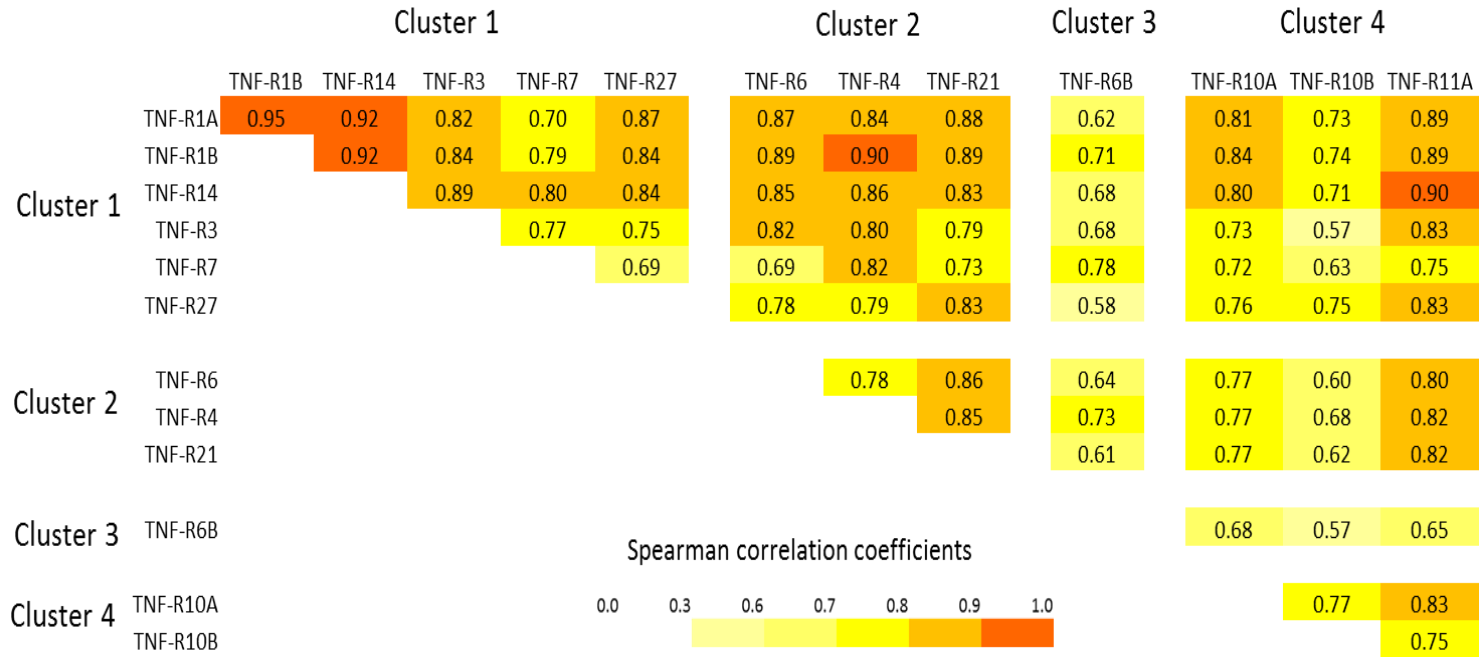

**Supplementary Figure S2.** Distribution of HbA<sub>1c</sub> (%) at three examinations in individuals ( $n=24$ ) included in the Macro-Albuminuria sub-cohort.

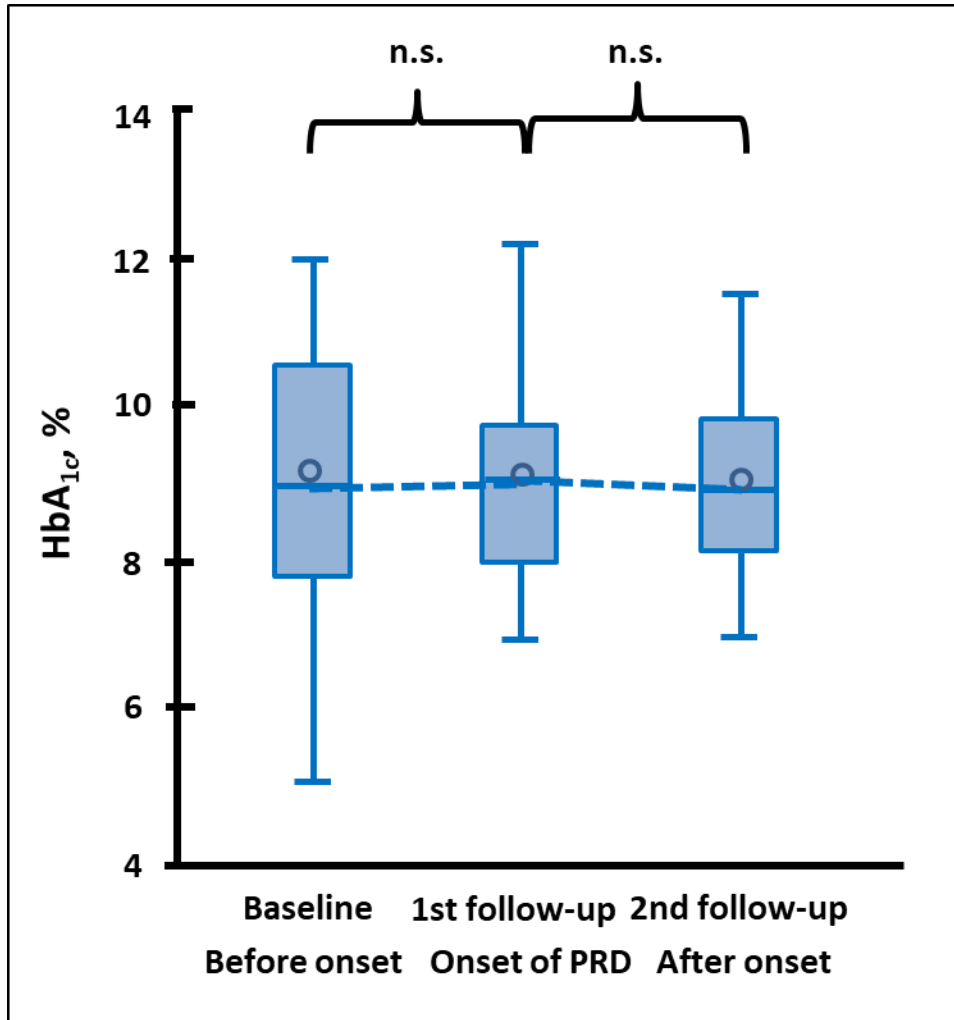



**New Supplementary Figure S3:** Matrix of Spearman correlation coefficients among plasma concentrations for 6 tumor necrosis factor (TNF) receptors (TNF-R3, TNF-R6B, TNF-R7, TNF-R10A, TNF-R11A, TNF-R12A) determined in patients who had both SOMAscan and OLINK measurements ( $n= 130$ ). (A) Correlation coefficients among TNF receptors measured using OLINK platform. (B) Correlation coefficients among TNF receptors measured using SOMAscan platform.

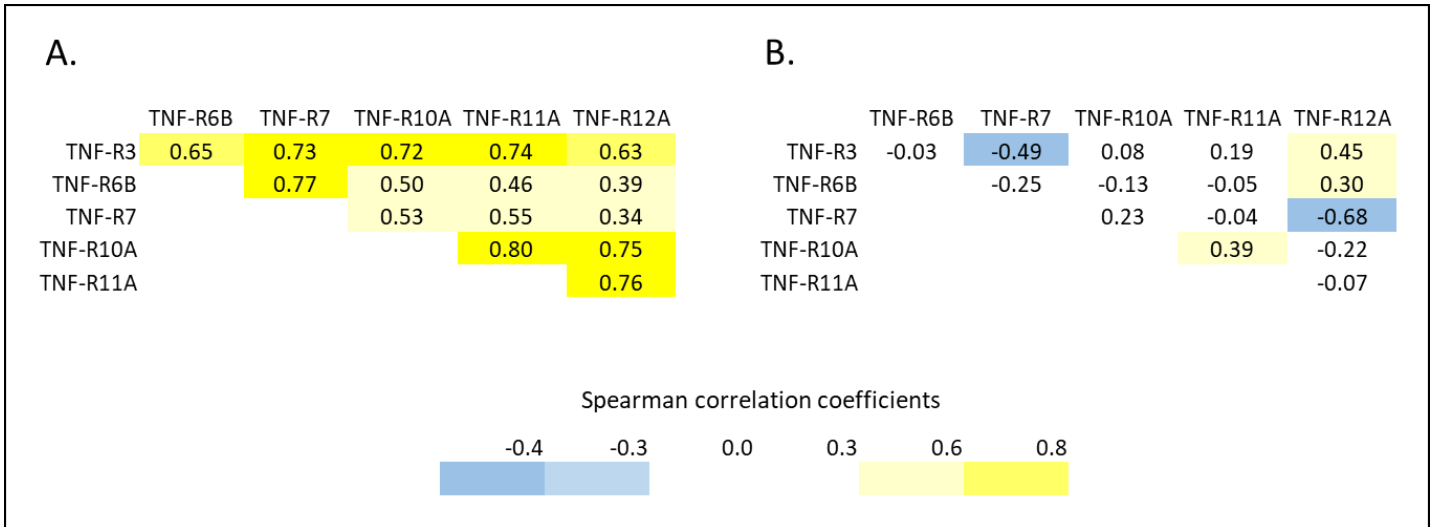

Supplement: NIHMS1666859-supplement-1.pdf [file NIHMS1666859-supplement-1.pdf]
